# Supplementary material
Source: publisher figshare collection journal article supplement (https://sage.figshare.com/ndownloader/files/10848722)
Supplement: Supplementary file 1 [file 10848722]

## Figure 1. Interview Guide

### UNDERSTANDING THE DIAGNOSIS: WHAT IT MEANS TO HAVE B-CELL NHL

1. Let's start with your overall impression about the education activity/video. What prompted you to take part in this activity?
  - a. What did you think about it?
2. Before you participated in the activity, how would you have described B-cell NHL to someone?
  - a. How would you describe B-cell NHL to someone now (after the activity)?  
[Examples to look for: abnormal changes in white cells/lymphocytes that grow—there are different types; swollen lymph nodes; soaking night sweats; unexplained weight loss]
3. In the first part of the activity, people talk about being diagnosed with B-cell NHL.
  - a. Did the activity change how you think about B-cell NHL?
    - i. In what ways?
4. What would you tell someone with B-cell NHL about symptoms and how they might affect daily life?
5. What would you say to a patient who was diagnosed with B-cell NHL about what to expect?
6. What should people with B-cell NHL ask their doctors when they have just been diagnosed? [Look for: what type of lymphoma do I have? what stage? what is the cause? who will be part of my care team?]

### THE WORK UP: WHICH TESTS TO EXPECT FOR B-CELL NHL

1. If someone who was newly diagnosed with B-cell NHL asked you which lab tests they might need to get, what would you tell them? [probe for e.g., blood tests, imaging, biopsy, lumbar puncture, echocardiogram]
2. What can you tell me what those tests are for? [probe for, e.g., staging, health status, subtype]
3. What would you tell someone going for tests about what to expect or how to prepare?
  - a. Before, during, after?
4. What questions should patients ask their doctors about the tests/exams?

### TREATING B-CELL NHL

1. What can you tell me about treatment options for B-cell NHL? [probe for, e.g. chemotherapy/R-CHOP, radiation therapy, stem-cell transplant, rituximab/targeted therapy]
  - a. Is this treatment you have had, personally?
  - b. Do you hear about this treatment during the activity?
  - c. Have you heard about targeted treatment for B-cell NHL?
  - d. What can you tell me about this form of treatment? [block specific parts of cancerous cells/stop lights; avoid attacking healthy cells; can be used w/other treatments]
2. What questions should patients ask their doctors about treatment options?
3. What should people with B-cell NHL expect from treatment? [e.g. side effects]

4. How would you know if the treatment was causing any side effects?
5. What kind of side effects would you be on the lookout for, with any of the treatments you've talked about? [probe for, e.g., hair loss, fatigue, nausea/vomiting, infection, other]
6. What can you tell me about treatment to reduce the side effects of chemotherapy? [probe for, e.g. medicine to reduce infection risk/growth factor prophylaxis; medicine to reduce vomiting/antiemetics; medicine before treatment/to reduce infusion reaction]
7. And if you saw something that made you think you might be having a side effect, what would you do about it?
  - a. Is there anyone you would contact to get help?
